# Supplementary material for: Message development for a communication campaign to support health warning labels on cigars: a qualitative study
Source: PubMed Central journal article supplement — BMC Public Health. 2024 Dec 19;24:3535. doi: 10.1186/s12889-024-21097-1 (PMC11660663; doi:10.1186/s12889-024-21097-1), 2024-12-19
Supplement: 12889_2024_21097_MOESM3_ESM.pdf [file 12889_2024_21097_MOESM3_ESM.pdf]

## **Final codebook – LCC messages**

### **Research Question:**

Overarching: To develop a set of effective messages for a communication campaign targeted to young adults who use LCCs.

- 1) Which message type is the most effective to augment new health warning labels for LCC products for young adults who are African American or Black, or white?
  - a. Rationale for white/black: LCCs frequently used by white and black young adults

| Primary Code                | Definition                                                                                                                                              | When to Apply    | When Not to Apply | Examples                                                                                                                                 |
|-----------------------------|---------------------------------------------------------------------------------------------------------------------------------------------------------|------------------|-------------------|------------------------------------------------------------------------------------------------------------------------------------------|
| <b>Intro</b>                |                                                                                                                                                         |                  |                   |                                                                                                                                          |
| <b>Product Experience</b>   | When a participant discusses how or why they began using LCCs.                                                                                          | Intro            |                   | “ I would’ve been 23.”                                                                                                                   |
| <b>Social influence</b>     | When a participant discusses how social influences (e.g. peers, family) impacted their use of LCCs.                                                     | Intro            |                   | “I started smoking cigars with my friends”                                                                                               |
| <b>Message Reaction</b>     |                                                                                                                                                         |                  |                   |                                                                                                                                          |
| <b>Initial Reaction</b>     | A participant’s first impression or initial reaction to a health message.                                                                               | Pos/Neg Response |                   |                                                                                                                                          |
| <b>HWL_Feelings</b>         | When a participant discusses how a message made them feel about the associated HWL.                                                                     | Pos/Neg Response |                   | “ Test-1B-Col makes me feel sad because, obviously, you wouldn’t wanna see your mother in the hospital with colon cancer.”               |
| <b>Shock</b>                | When a participant discusses any surprise or shock associated with viewing a message.                                                                   | Pos/Neg Response |                   | “I was absolutely shocked.”                                                                                                              |
| <b>Attention-Grabbing</b>   | When a participant reflects on whether a message gets their attention or is noticeable.                                                                 | Pos/Neg Response |                   | “And especially for—like, I-I don’t have a lot of attention span for this kinda stuff.”                                                  |
| <b>Informative</b>          | When a participant reflects on how a message was either informative or not.<br>I.e.: provided new knowledge (e.g., knowledge of potential health risks) | Pos/Neg Response |                   | “So it’s asking you a question and, at the same time, gives you a solution. I mean, informing you about it so that you know what to do.” |
| <b>Clear/Understandable</b> | When a participant notes whether they like a message because it is clear, understandable, easy to understand or comprehend or not.                      | Pos/Neg Response |                   | “ Okay, thank you. Because it’s-it’s very straightforward and very, very easy to understand. It goes straight to the point.”             |
| <b>Relatable</b>            | When a participant notes whether or not they find a message to be relatable/resonates with them.                                                        | Pos/Neg Response |                   | “ And the reason I’ll choose Test-1B-Col is, um, I feel with Test-1B-Col I can really relate to it.”                                     |
| <b>Persuasive</b>           | When a participant reflects on whether a message is persuasive or not.                                                                                  | Pos/Neg Response |                   | “ Test-1B-Col makes me feel sad...maybe a bit more of a pushing motivator to, like, take initiative to quit.                             |

| Primary Code                | Definition                                                                                                                                            | When to Apply    | When Not to Apply | Examples                                                                                                          |
|-----------------------------|-------------------------------------------------------------------------------------------------------------------------------------------------------|------------------|-------------------|-------------------------------------------------------------------------------------------------------------------|
| <b>Credibility</b>          | When a participant reflects on a message's credibility (e.g., doctor, FDA). This includes if they find the message more or less credible.             | Pos/Neg Response |                   |                                                                                                                   |
| <b>Motivational</b>         | When a participant reflects on how a message makes you feel motivated or not.                                                                         | Pos/Neg Response |                   |                                                                                                                   |
| <b>Emotional</b>            | When a participant reflects on how a message makes them emotional or not.                                                                             | Pos/Neg Response |                   |                                                                                                                   |
| <b>Fear</b>                 | When a participant discusses how a message does or does not make them feel frightened, scared, or fearful of a health effect after viewing a message. | Pos/Neg Response |                   | <p>" Like, it's very, very effective to scare people away"</p> <p>"So when I read it, I was not that scared."</p> |
| <b>Family/Friends</b>       | When a participant reflects on how a message makes them think about their family or friends.                                                          | Pos/Neg Response |                   | " So, for instance, it talks about a chance to see my mother in the hospital with colon cancer."                  |
| Illustrative                | When a participants mentions how a warning image is illustrated by the message.                                                                       | General response |                   |                                                                                                                   |
| Patronizing Message         | "When a participant reflects on how a message is condescending, patronizing, or belittling.                                                           | General response |                   |                                                                                                                   |
| Confusion                   | When a participant expresses that they are confused by a message or concept.                                                                          | General response |                   |                                                                                                                   |
| Disturbing                  | When a participant finds either the message or image to be disturbing or distressing.                                                                 | General response |                   |                                                                                                                   |
| ** .Statistics              | When a participant mentions the need for statistics, or numbers in messages (falls with advice.)                                                      | General response |                   |                                                                                                                   |
| <b>Reflection on Health</b> | When a participant discusses how a message makes them think about the health consequences of cigar use on themselves or others.                       | Pos/Neg Response |                   | " Yeah, Expl-2D-Eso offered an immediate threat to my health, um, and so it was really effective for me"          |
| <b>Message Length</b>       | When a participant speaks about the length of message. Ex: To the point, concise, not too long, not too short                                         | Pos/Neg Response |                   | "Yeah, shortening. I mean, I don't know. It just seemed kind of repetitive."                                      |

| Primary Code                                                                               | Definition                                                                                                          | When to Apply    | When Not to Apply | Examples                                                                                                                                                                                             |
|--------------------------------------------------------------------------------------------|---------------------------------------------------------------------------------------------------------------------|------------------|-------------------|------------------------------------------------------------------------------------------------------------------------------------------------------------------------------------------------------|
| <b>Believable</b>                                                                          | When a participant discusses what made a message believable or convincing or not.                                   | Pos/Neg Response |                   | When a participant discusses what made a message believable or convincing or not.                                                                                                                    |
| <b>More Info</b>                                                                           | When a participant discusses that they want more information (e.g., statistics, incidence, prevalence ratios, etc.) | Neg Response     |                   | " Like, I would wanna know, like, what risk is, you know, equivalent to how many, like, cigarettes or cigarillos or cigars or whatever you're smoking, like, if it's going up exponentially or not." |
| <b>Other Like</b>                                                                          | When a participant discusses anything else they liked about a message not otherwise noted.                          | Pos response     |                   |                                                                                                                                                                                                      |
| <b>Other Dislike</b>                                                                       | When a participant discusses what they dislike about a message.                                                     | Neg Response     |                   |                                                                                                                                                                                                      |
| <b>Message Misconception</b>                                                               | When a participant has misconceptions or perceives incorrect information from a message presented.                  | Neg Response     |                   |                                                                                                                                                                                                      |
| Actions (how messages influence curiosity, willingness to share, worry about health, etc.) |                                                                                                                     |                  |                   |                                                                                                                                                                                                      |
| <b>Curiosity</b>                                                                           | When a participant discusses what made them want to learn more or not learn more about a message.                   | Pos/Neg Response |                   | "—I forget which one but at the end of one of those, I'd be likely to click it just to learn more."                                                                                                  |
| <b>Share</b>                                                                               | When a participant discusses what made them want to share or not share information about the messages with others.  | Pos/Neg Response |                   | " Yeah, Expl-2D-Eso gives me information that I could share with people that most of my friends probably wouldn't know"                                                                              |
| <b>Worry</b>                                                                               | When a participant discusses what messages make them worry or concerned about their health.                         | General response |                   | " Like, I don't wanna—you know? So, like, if I was worried about my health, that would be one of the things I would immediately think of and-and worry about."                                       |
| <b>Recall</b>                                                                              | When a participant discusses whether they will recall a warning.                                                    | Pos/Neg Response |                   | "Yeah, I wouldn't—I mean, it wouldn't-wouldn't stick with me probably."                                                                                                                              |
| <b>Cigar Desire</b>                                                                        | When a participant discusses how a message affected their desire to use cigar products.                             | Pos/Neg Response |                   | " Expl-2D-Eso would want me to kinda curb my use"                                                                                                                                                    |

| Primary Code                       | Definition                                                                                                                                                       | When to Apply    | When Not to Apply | Examples                                                                                                                 |
|------------------------------------|------------------------------------------------------------------------------------------------------------------------------------------------------------------|------------------|-------------------|--------------------------------------------------------------------------------------------------------------------------|
| <b>Quit Intentions</b>             | When a participant discusses how a message affects their desire to quit/intentions.                                                                              | Pos/Neg Response |                   | “ I definitely think that all the messages, um, really do want me, like, to at least cut back, if not quit, completely.” |
| <b>General</b>                     |                                                                                                                                                                  |                  |                   |                                                                                                                          |
| <b>Match</b>                       | When a participant discusses if a message about the HWL matches the HWL.                                                                                         | General response |                   | “So Test-1B-Col could be paired with an image really well.”                                                              |
| <b>Warning Image</b>               | When a participant discusses the health warning label image.                                                                                                     | General response |                   | “ Yeah. I—honestly, um, the images are really disturbing to me. Gross might be another word.”                            |
| Targeting                          | When a participant mentions who they believe a message is targeting.                                                                                             | General response |                   |                                                                                                                          |
| Prior Warning Experience/Knowledge | "When a participant discusses prior warnings they have encountered or pre-existing knowledge they have about warnings.                                           | General response |                   |                                                                                                                          |
| <b>Advice</b>                      | When a participant discusses any other ideas, recommendations, or advice they have for message development.                                                      | General response |                   | “Make it visceral, make it really real, you know, so—like, to scare people...”                                           |
| <b>Interesting Quote</b>           | When the participant provides an interesting insight or thought that does not necessarily "fit" into any of the pre-defined codes that one may find interesting. | General response |                   |                                                                                                                          |
| <b>Follow-up</b>                   | When there is something you want to discuss with the team/follow-up about.                                                                                       |                  |                   |                                                                                                                          |
| <b>Message Types</b>               |                                                                                                                                                                  |                  |                   |                                                                                                                          |
| <b>Testimonial</b>                 | Testimonial style message.                                                                                                                                       |                  |                   |                                                                                                                          |
| <b>Explanatory</b>                 | Explanatory style message.                                                                                                                                       |                  |                   |                                                                                                                          |
| <b>Recommendation</b>              | Recommendation style message.                                                                                                                                    |                  |                   |                                                                                                                          |
| <b>Inquisitive</b>                 | Inquisitive style message.                                                                                                                                       |                  |                   |                                                                                                                          |

## Unique Message Coding

For each of the 36 unique messages , code their distinct message identifier that people were talking about.

Associated Message Identifier: Distinct Type-Message#-Disease combo used to identify a certain message.

→Code the message whenever someone mentions that message whether alone or as a group. When multiple messages are talked about, code all of the messages mentioned.

For Ex: if they are talking about Expl-1A-Eso compared to Test-1B-Eso , we would code that section completely for Expl-1A-Eso and Test-1B-Eso

|                                      |                                                |
|--------------------------------------|------------------------------------------------|
| <b>Associated Message Identifier</b> | Message associated with the message identifier |
|--------------------------------------|------------------------------------------------|

### Focus Group Materials 1

|             |                                                                                                                                                                                                                                   |
|-------------|-----------------------------------------------------------------------------------------------------------------------------------------------------------------------------------------------------------------------------------|
| Expl-1A-Eso | New health warning labels on cigar packs show that cigars can cause esophageal cancer. Esophageal cancer can also affect young adults.                                                                                            |
| Test-1B-Eso | "I never imagined cigars could increase your risk of esophageal cancer. Seeing my friend suffer from esophageal cancer, I now understand why the FDA's new health warning labels on cigar packages talk about esophageal cancer." |
| Inq-1C-Eso  | Why should you quit using cigars? New health warning labels on cigar packs show the negative health effects cigars can cause, including esophageal cancer.                                                                        |
| Rec-1D-Eso  | "As a doctor, I strongly advise that you quit cigars. I support the new warnings created by the FDA because use of cigars can increase your risk of esophageal cancer."                                                           |
| Expl-2A-Lng | The FDA has new warnings on cigars that are directly relevant to young adults because cigars can cause lung cancer.                                                                                                               |
| Rec-2B-Lng  | Tobacco treatment specialists support the new health warning labels on cigar packages because the new warnings show that use of cigars increase your risk of lung cancer.                                                         |
| Inq-2C-Lng  | Have you seen the new warnings on cigar packs? I learned that smoking cigars can cause lung cancer. Young people need to know cigars are not a healthy alternative to cigarettes.                                                 |
| Test-2D-Lng | "It hurts to see my mother in the hospital with lung cancer. She used to smoke cigars. We now know that cigars cause lung cancer as seen on the new health warning labels."                                                       |
| Expl-3A-Col | New health warnings on cigars show that they cause colon cancer. This may lead to removal of all or part of the colon.                                                                                                            |
| Inqu-3B-Col | Did you know that new warnings show the harm of cigars? The FDA's new health warnings for cigars show the potential health effects like colon cancer.                                                                             |
| Test-3C-Col | "Dealing with colon cancer has been tough. It may have been avoided if I had known that cigars can cause colon cancer. The new health warning labels on cigars now have that information."                                        |
| Rec-3D-Col  | The U.S. Surgeon General supports the new health warnings on cigar products. Cigar use does increase your chances of getting colon cancer.                                                                                        |

### Focus Group Materials 2

|             |                                                                                                                                                                               |
|-------------|-------------------------------------------------------------------------------------------------------------------------------------------------------------------------------|
| Expl-1A-Col | The FDA has new warnings on cigars that are directly relevant to young adults because cigars can cause colon cancer.                                                          |
| Test-1B-Col | "It hurts to see my mother in the hospital with colon cancer. She used to smoke cigars. We now know that cigars cause colon cancer as seen on the new health warning labels." |

|                         |                                                                                                                                                                                                                    |
|-------------------------|--------------------------------------------------------------------------------------------------------------------------------------------------------------------------------------------------------------------|
| Reco-1C -Col            | "As a doctor, I strongly advise that you quit cigars. I support the new warnings created by the FDA because use of cigars can increase your risk of colon cancer."                                                 |
| Inqu-1D-Col             | Have you seen the new warnings on cigar packs? I learned that smoking cigars can cause colon cancer. Young people need to know cigars are not a healthy alternative to cigarettes.                                 |
| Inqu-2A-Eso             | Did you know that new warnings show the harm of cigars? The FDA's new health warnings for cigars show the potential health effects like esophageal cancer.                                                         |
| Test-2B-Eso             | "Dealing with esophageal cancer has been tough. It may have been avoided if I had known that cigars can cause esophageal cancer. The new health warning labels on cigars now have that information."               |
| Reco-2C-Eso             | Tobacco treatment specialists support the new health warning labels on cigar packages because the new warnings show that use of cigars increase your risk of esophageal cancer.                                    |
| Expl-2D-Eso             | New health warnings on cigars show that they cause esophageal cancer. This may lead to removal of all or part of the esophagus.                                                                                    |
| Test-3A-Lng             | "I never imagined cigars could increase your risk of lung cancer. Seeing my friend suffer from lung cancer, I now understand why the FDA's new health warning labels on cigar packages talk about lung cancer."    |
| Inqu-3B-Lng             | Why should you quit using cigars? New health warning labels on cigar packs show the negative health effects cigars can cause, including lung cancer.                                                               |
| Expl-3C-Lng             | New health warning labels on cigar packs show that cigars can cause colon cancer. Lung cancer can also affect young adults.                                                                                        |
| Reco-3D-Lng             | The U.S. Surgeon General supports the new health warnings on cigar products. Cigar use does increase your chances of getting lung cancer.                                                                          |
| Focus Group Materials 3 |                                                                                                                                                                                                                    |
| Test-1ALng              | "Dealing with lung cancer has been tough. It may have been avoided if I had known that cigars can cause lung cancer. The new health warning labels on cigars now have that information."                           |
| Inqu-1B-Lng             | Did you know that new warnings show the harm of cigars? The FDA's new health warnings for cigars show the potential health effects like lung cancer.                                                               |
| Reco-1C-Lng             | "As a doctor, I strongly advise that you quit cigars. I support the new warnings created by the FDA because use of cigars can increase your risk of lung cancer."                                                  |
| Expl-1D-Lng             | New health warnings on cigars show that they cause lung cancer. This may lead to removal of all or part of the lung.                                                                                               |
| Test-2A-Col             | "I never imagined cigars could increase your risk of colon cancer. Seeing my friend suffer from colon cancer, I now understand why the FDA's new health warning labels on cigar packages talk about colon cancer." |
| Reco-2B-Col             | Tobacco treatment specialists support the new health warning labels on cigar packages because the new warnings show that use of cigars increase your risk of colon cancer.                                         |
| Expl-2C-Col             | New health warning labels on cigar packs show that cigars can cause colon cancer. Colon cancer can also affect young adults.                                                                                       |

|             |                                                                                                                                                                                         |
|-------------|-----------------------------------------------------------------------------------------------------------------------------------------------------------------------------------------|
| Inqu-2D-Col | Why should you quit using cigars? New health warning labels on cigar packs show the negative health effects cigars can cause, including colon cancer.                                   |
| Inqu-3A-Eso | Have you seen the new warnings on cigar packs? I learned that smoking cigars can cause esophageal cancer. Young people need to know cigars are not a healthy alternative to cigarettes. |
| Reco-3B-Eso | The U.S. Surgeon General supports the new health warnings on cigar products. Cigar use does increase your chances of getting esophageal cancer.                                         |
| Expl-3C-Eso | The FDA has new warnings on cigars that are directly relevant to young adults because cigars can cause esophageal cancer.                                                               |
| Test-3D-Eso | "It hurts to see my mother in the hospital with esophageal cancer. She used to smoke cigars. We now know that cigars cause esophageal cancer as seen on the new health warning labels." |
